# Supplementary material
Source: PubMed Central journal article supplement (PMC5444162)
Supplement: AAC.00356-17_zac006176261s1.pdf [file AAC.00356-17_zac006176261s1.pdf]

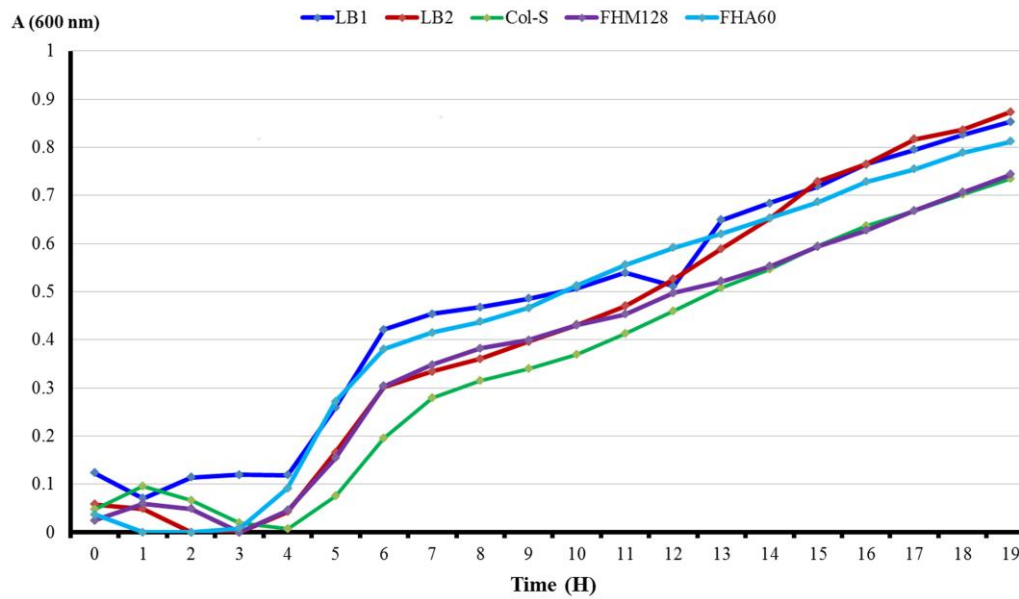

**Fig S1. Growth rates of isogenic strains LB1 and LB2, and a colistin-susceptible strain (Col-S) and 2 *mcr-1* strains FHM128 and FHA60 as control.** Inocula of  $10^4$  UFC/mL were prepared in LB broth medium within a 96-well plate that was incubated at 37°C in ELX808 Ultra Microplate Readers (Biotek Instruments, Winooski, USA). Absorbance was read every hour at a wavelength of 600 nm.
